# Supplementary material
Source: PubMed Central journal article supplement (PMC9765025)
Supplement: aac.00977-22-s0001.pdf [file aac.00977-22-s0001.pdf]

1 **Supplemental material**

## 2 Table S1. List of primers and plasmids used in the study

| <b>Primer purpose</b>                                                                                             | <b>Gene</b>                  | <b>Primer name and sequence</b>                                                                                                                    |
|-------------------------------------------------------------------------------------------------------------------|------------------------------|----------------------------------------------------------------------------------------------------------------------------------------------------|
| Amplification of<br><i>CaCas9</i> cassette                                                                        | <i>CaCas9</i>                | CaCas9 F, ATCTCATTAGATTTGGAACCTTGTGGGG<br>TT<br>CaCas9 R, TTCGAGCGTCCCAAACCTTCT                                                                    |
| Amplification of<br><i>SNR52</i> promoter<br>and sgRNA scaffold                                                   |                              | SNR52 F, AAGAAAGAAAGAAAACCAGGAGTGAA<br>sgRNA R, ACAAATATTTAAACTCGGGACCTGG                                                                          |
| Amplification of final<br>sgRNA expression<br>cassette                                                            |                              | SNR52/N F, GCGGCCGCAAGTGATTAGACT<br>sgRNA/N R, GCAGCTCAGTGATTAAGAGTAAAGAT<br>GG                                                                    |
| Amplification of<br>sgRNA promoter<br>and <i>SNR52</i> scaffold<br>with overlapping<br>ORF/gene guide<br>sequence | <i>ECS1</i><br>(orf.19.1766) | sgRNA/F_19.1766 F, ATTCAGCTATTAATGCCACA<br>GTTTTAGAGCTAGAAATAGCAAGTTAAA<br>SNR52/R_19.1766 R, TGTGGCATTAAATAGCTGAAT<br>CAAATTA AAAATAGTTTACGCAAGTC |
| Same as above                                                                                                     | <i>ECS2</i><br>(orf.19.6867) | sgRNA/F_19.6867 F, GGGAACGAGTGAAAATAGG<br>GGTTTTAGAGCTAGAAATAGCAAGTTAAA<br>SNR52/R_19.6867 R, CCCTATTTTCACTCGTTCCC<br>CAAATTA AAAATAGTTTACGCAAGTC  |
|                                                                                                                   | <i>LEU42</i>                 | sgRNA/F_19.1375 F, GCTTGGATAAACCAACAAGA<br>GTTTTAGAGCTAGAAATAGCAAGTTAAA<br>SNR52/R_19.1375 R, TCTTGGTGGTTTATCCAAGC                                 |

|                                                                    |                              |                                                                                                                                                                                                                                                                            |
|--------------------------------------------------------------------|------------------------------|----------------------------------------------------------------------------------------------------------------------------------------------------------------------------------------------------------------------------------------------------------------------------|
| Same as above                                                      | (orf.19.1375)                | CAAATTA AAAATAGTTTACGCAAGTC                                                                                                                                                                                                                                                |
| Same as above                                                      | <i>PR26</i><br>(orf.19.5793) | sgRNA/F_19.5793 F, GGGCACAAGAAGAAGTCAA<br>GGTTTTAGAGCTAGAAATAGCAAGTTAAA<br>SNR52/R_19.5793 R, CTTGACTTCTTCTTGTGCCC<br>CAAATTA AAAATAGTTTACGCAAGTC                                                                                                                          |
| Same as above                                                      | <i>ECS3</i><br>(orf.19.5833) | sgRNA/F_19.5833 F, AACTTGTTTAAAGCTGATGG<br>GTTTTAGAGCTAGAAATAGCAAGTTAAA<br>SNR52/R_19.5833 R, CCATCAGCTTTAAACAAGTT<br>CAAATTA AAAATAGTTTACGCAAGTC                                                                                                                          |
| Amplification of<br>ORF/gene deletion<br>cassette with <i>NAT1</i> | <i>ECS1</i><br>(orf.19.1766) | orf19.1766 F, TATTTCTGAAAATCCTTGTTTGTTTG<br>TTTTTTTTTTTTTTTCAAATATCCTATAAATCCTAG<br>TTATATTTAATAAATGATGATGATTCATCCCATTCA<br>TTCCATC<br>orf19.1766 R, TTATAATCATAAATAAATAAATAATT<br>CCATACTTCAAAGAAGAATATAAATTTTATCAAAT<br>GTTAAAATACTGTTATTTTGCCGCTCTAGAACTAG<br>TGGATCT   |
| Same as above                                                      | <i>ECS2</i><br>(orf.19.6867) | orf19.6867 F, GAAAGTATCAATTCCTTAAC TTTTTCTA<br>TATCAACCTAGAGTTAACAATCTTTTGTTTGCTTT<br>ATAATTGCTGAGCTACAGATGATTCATCCCATTCA<br>TTCCATC<br>orf19.6867 R, AACTATCATATAACGCCTATTATGAA<br>AAAAAAAAA CAAAATATTA AACTCAAACGCTAAT<br>CAGTGAAACATACTCTTGAGCCGCTCTAGAACTA<br>GTGGATCT |

|               |                               |                                                                                                                                                                                                                                                                               |
|---------------|-------------------------------|-------------------------------------------------------------------------------------------------------------------------------------------------------------------------------------------------------------------------------------------------------------------------------|
| Same as above | <i>LEU42</i><br>(orf.19.1375) | orf19.1375 F, TTCTTACTATTTTTCTTTTTGAAGTTTT<br>G TTCAGTTTATTATATCTAATTA ACTTACCATTAAC<br>TAATCCACCATGCCTGATGATTCATCCCATT<br>CATT<br>CCATC<br>orf19.1375 R, ATTGAAGAACTACCATACTTCTTGTT<br>GTTGGTTAACCTTCGTGCCTTATCACTTGCCCATT<br>ATACCTATTCTTTGTCTTCGCCGCTCTAGAACTAG<br>TGGATCT |
| Same as above | <i>PR26</i><br>(orf.19.5793)  | orf19.5793 F, TGATTGAAA ACTCTGTCGCCACTTG<br>AATTTCTAGTCAGCAATACTAAACCTTATTATTCA<br>CCACAAAGAAGTTTTAGGAGGATGATTCATCCCA<br>TTCATTCCATC<br>orf19.5793 R, TAAATCAGAGAAGCAACGTTTTGTT<br>TTATTTAATTTTATTTTATTCTTTACTTTACAAAATA<br>ATAAAAAAGCTAGTAAATGCCGCTCTAGAACTAG<br>TGGATCT     |
| Same as above | <i>ECS3</i><br>(orf.19.5833)  | orf19.5833 F, AACCTACACACAAAAGAAATTATAC<br>GCAATTGCTACTTTTGAATATAACTATTTTCTTTCT<br>CAATCATCATATATTAACAGATGATTCATCCCATT<br>CATTCCATC<br>orf19.5833 R, TTTTGTACCTATAAAAATATAGAGT<br>TTATTCCTATAATATTCCTGTTTCTTGATATTTCA<br>CATTATTACTACGAGAATGCCGCTCTAGAACTAG<br>TGGATCT        |
|               |                               | orf19.1766-fwd F, AGTAGTCAATCAATCACCTTAAT                                                                                                                                                                                                                                     |

|                                      |                               |                                                                                                                                                            |
|--------------------------------------|-------------------------------|------------------------------------------------------------------------------------------------------------------------------------------------------------|
| Confirmation of deletion of ORF/gene | <i>ECS1</i><br>(orf.19.1766)  | ACC<br>orf19.1766-rev R, CATAGCAACACCAATGGTATAA<br>GT<br>Flk19.1766-rev R, CAATTCATCTATTATTTCCATTC<br>TAAGTTTGTTT                                          |
| Same as above                        | <i>ECS2</i><br>(orf.19.6867)  | orf19.6867-fwd F, TTGTTTGAAGTATTGAGAGGGA<br>A<br>orf19.6867-rev R, CAATTATACCTTGCTGCTTTTCA<br>TC<br>Flk19.6867-rev R, CCTACATGAAATTATCAATACTC<br>CTACATCTA |
| Same as above                        | <i>LEU42</i><br>(orf.19.1375) | orf19.1375-fwd F, CAAAAAACTCCTGACTCATCTTC<br>AAATA<br>orf19.1375-rev R, ACGGTCAGTAATATGAGTGGC<br>Flk19.1375-rev R, AAATTTACACGATGAGAAGTTC<br>AAAAGA        |
| Same as above                        | <i>PR26</i><br>(orf.19.5793)  | orf19.5793-fwd F, CAGTAAAGTTTAATGGAACAGT<br>AGC<br>orf19.5793-rev R, CCCATCCATTTGATTCAATAAC<br>TC<br>Flk19.5793-rev R, CCCAGTTTGGAACACTACTTTT<br>C         |
|                                      | <i>ECS3</i>                   | orf19.5833-fwd F, GAAACTAAGTTGAATGGCTGCA<br>orf19.5833-rev R, CAGTGGTTCAACTGTCTTTGG<br>Flk19.5833-rev R, CAAATGAAAGCTGAAGAACAAG                            |

|                                      |                                                                                                               |                               |
|--------------------------------------|---------------------------------------------------------------------------------------------------------------|-------------------------------|
| Same as above                        | (orf.19.5833)                                                                                                 | GAA                           |
| Confirmation of deletion of ORF/gene | <i>NAT1</i>                                                                                                   | NAT1 RP4, CACAGACGCGTTGAATTGT |
| <b>Plasmids</b>                      | <b>Description and Purpose</b>                                                                                |                               |
| pV1093                               | <i>CaCas9/gRNA</i> cassette carrying ampicillin resistance gene, amplification of <i>CaCas9/gRNA</i> cassette |                               |
| pJK863                               | <i>CaNAT1-FLP</i> cassette carrying nourseothricin resistance gene, amplification of <i>NAT</i> cassette      |                               |

3

4

5

6

7

8

9

10

11

12

13

14

15

16

17

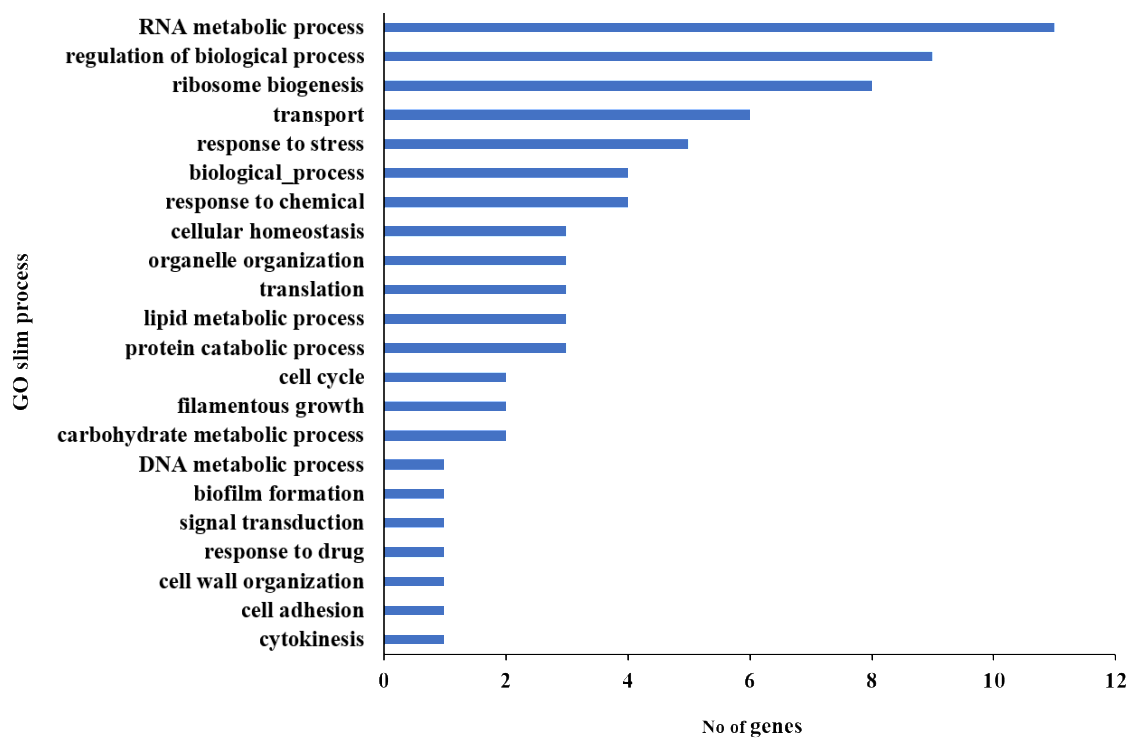

18

19

20 **Fig. S1.** GO Slim Mapper analysis of 35 differentially expressed genes that are similarly  
 21 changed across all caspofungin-adapted mutants: three aneuploids lacking one Ch5 (SMC60-2-  
 22 5, SMC60-3-4 and JMC200-3-4) and two normal diploids (JMC160-2-5 and JMC200-2-5). X-  
 23 axis represents number of genes, whereas Y-axis represents categories.

24

25

26

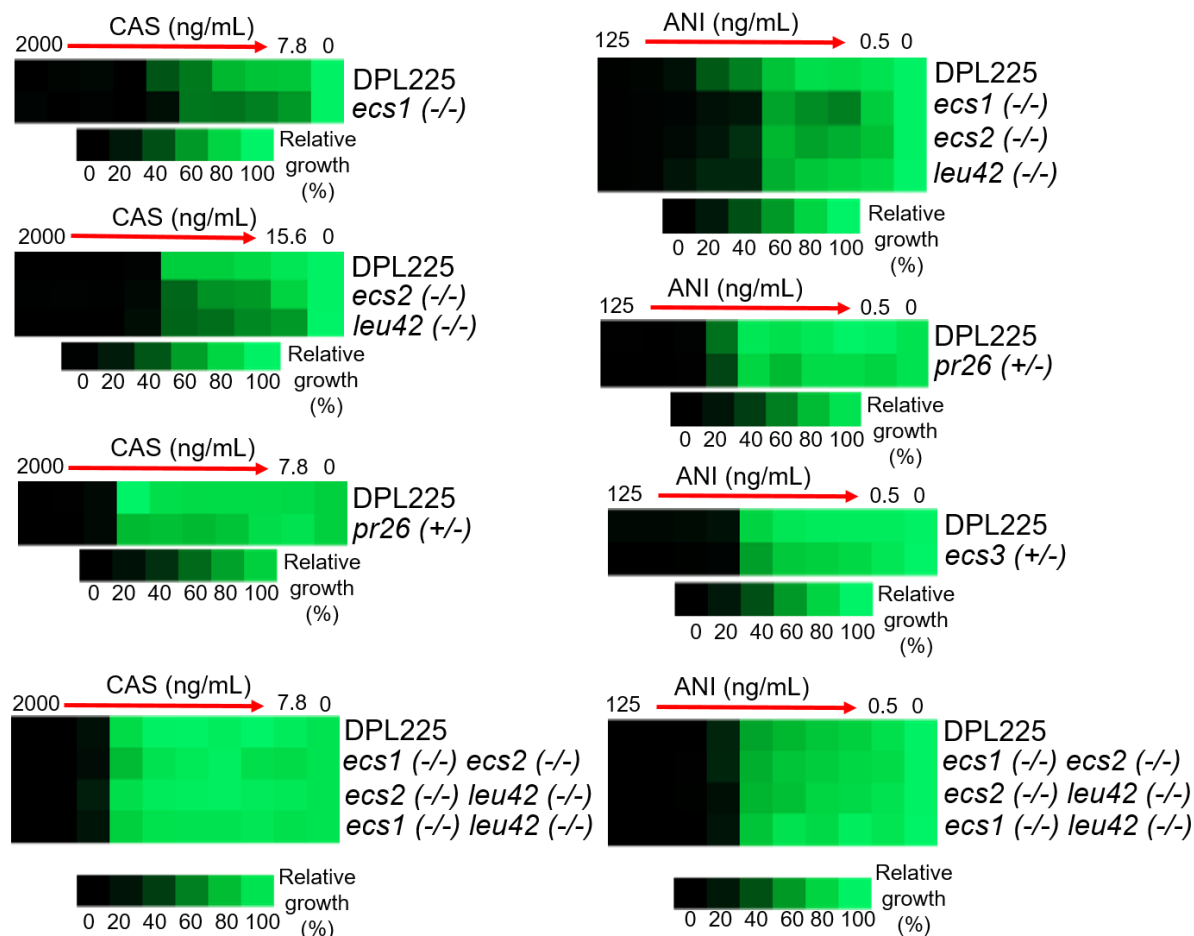

27

28 **FIG S2.** Heat map presenting growth of various *C. albicans* strains by broth microdilution  
 29 assay. CAS and ANI refer to caspofungin and anidulafungin, correspondingly. Shown are  
 30 parental strain DPL225, additional biological repeats of null mutants lacking *ECS1*, *ECS2*, or  
 31 *LEU42*, as well as additional biological repeats of mutants lacking one copy of *PR26* or *ECS3*.  
 32 Additional biological repeats of double-deletion mutants lacking *ECS1 ECS2*, *ECS2 LEU42* and  
 33 *ECS1 LEU42*, as well as parental strain DPL225 are shown at the bottom. Names and genotypes  
 34 of strains are indicated on the right. Assay was conducted according to CLSI method in medium  
 35 RPMI 1640 with 2% glucose. Assay included maximum caspofungin concentration of 2  $\mu$ g/ml  
 36 or anidulafungin concentration of 0.125  $\mu$ g/ml and two-fold serial dilutions.  $10^3$  cells were  
 37 inoculated in each well in either duplicates or triplicates (technical replicates) and tray was

38 incubated at 35°C for 24 h. Control wells without drug and cells were included. No cells control  
39 was used to subtract background. No drug control was used for normalization. Color bar for %  
40 growth is presented for each experiment underneath. Note diminished growth of deletion  
41 mutants vs parental strain. Also note elevated CAS MIC of DPL225.

42

43

44

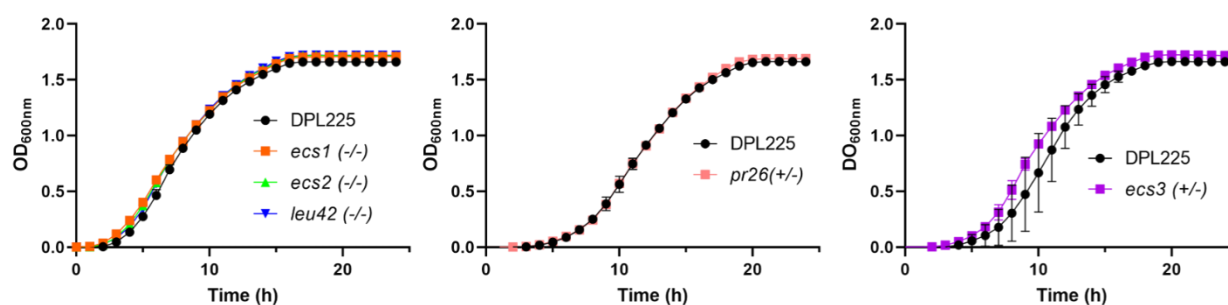

45

46 **FIG S3.** Growth curves of *C. albicans* deletion mutants vs parental DPL225. Shown are

47 DPL225, *ecs1*<sup>-/-</sup>, *ecs2*<sup>-/-</sup> and *leu42*<sup>-/-</sup> (left panel); DPL225 and *pr26*<sup>+/-</sup> (central panel); DPL225

48 and *ecs3*<sup>+/-</sup> (right panel). Cell growth was conducted in YPD medium at 35°C. Optical density

49 was measured at 600 nm and plotted against time. Mean and standard deviation of optical

50 density were calculated from three experiments.

51



1. Amplification of gene using  
5' flanking region

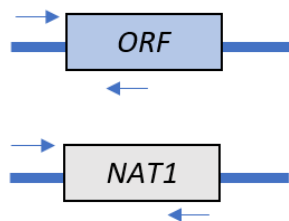

2. Amplification of gene using  
5' and 3' flanking regions

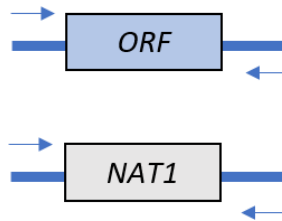

52

53 **FIG S4.** Cartoon showing strategy used to confirm deletion of a candidate gene. Presented are  
54 amplification of 5' junction of ORF of either a candidate gene or *NAT1*, as well as amplification  
55 of a candidate gene using flanking regions.

56

57

58

59

60

61

62

63

64
